# Supplementary material
Source: Research Square preprint supplement (doi:10.21203/rs.3.rs-9430391/v1)
Supplement: Supplementary file 1 [file 6d9210890ce77ba59943e262.xlsx]

## Sheet: Table S1 Growth conditions
Table S1. R. palustris CGA009::Tn5 competitive assay conditions
Condition #	Sample name	Media (10mL)	Carbon source	Concentration (mM)	Sodium bicarbonate (mM)	Growth condition	Initial cell density (OD660)	Harvest cell density (OD660)	Note
1	Starv 1-T0	CAAc	N/A	N/A	N/A	30C; anaerobic; light	~0.1	0.849	Outgrowth culture from carbon starvation T0 (True T0 sample for biological replicate 1, i.e., all other UW samples highlighted in pink); Details for all samples in the carbon starvation experiment: (1) PM washed CAAc/Km grown cells were inoculated into PM/acetae (4 biological replicates) and incubated at 30C in the light, (3) Harvested cells from outgrowth culture when OD660 reached to 1.0
	Starv 2-T0	CAAc	N/A	N/A	N/A	30C; anaerobic; light	~0.1	0.8	Outgrowth culture from carbon starvation T0 (True T0 sample for biological replicate 2, i.e., all other UW samples highlighted in green), (2) When growth arrested at T0 (T0 sample), T3, T7, and T14, took 0.1mL of culture and inoculated into CAAc for outgrowth,
	Starv 3-T0	CAAc	N/A	N/A	N/A	30C; anaerobic; light	~0.1	0.864	Outgrowth culture from carbon starvation T0 (True T0 sample for biological replicate 3, i.e., all other UW samples highlighted in purple)
	Starv 4-T0	CAAc	N/A	N/A	N/A	30C; anaerobic; light	~0.1	0.76	Outgrowth culture from carbon starvation T0 (True T0 sample for biological replicate 4, i.e., all other UW samples highlighted in orange)
2	Starv 1-T3	CAAc	N/A	N/A	N/A	30C; anaerobic; light	~0.1	0.741	Outgrowth culture from carbon starvation T3 (biological replicate 1)
	Starv 2-T3	CAAc	N/A	N/A	N/A	30C; anaerobic; light	~0.1	0.757	Outgrowth culture from carbon starvation T3 (biological replicate 2)
	Starv 3-T3	CAAc	N/A	N/A	N/A	30C; anaerobic; light	~0.1	0.701	Outgrowth culture from carbon starvation T3 (biological replicate 3)
	Starv 4-T3	CAAc	N/A	N/A	N/A	30C; anaerobic; light	~0.1	0.831	Outgrowth culture from carbon starvation T3 (biological replicate 4)
3	Starv 1-T7	CAAc	N/A	N/A	N/A	30C; anaerobic; light	~0.1	0.767	Outgrowth culture from carbon starvation T7 (biological replicate 1)
	Starv 2-T7	CAAc	N/A	N/A	N/A	30C; anaerobic; light	~0.1	0.715	Outgrowth culture from carbon starvation T7 (biological replicate 2)
	Starv 3-T7	CAAc	N/A	N/A	N/A	30C; anaerobic; light	~0.1	0.731	Outgrowth culture from carbon starvation T7 (biological replicate 3)
	Starv 4-T7	CAAc	N/A	N/A	N/A	30C; anaerobic; light	~0.1	0.774	Outgrowth culture from carbon starvation T7 (biological replicate 4)
4	Starv 1-T14	CAAc	N/A	N/A	N/A	30C; anaerobic; light	~0.1	0.79	Outgrowth culture from carbon starvation T14 (biological replicate 1)
	Starv 2-T14	CAAc	N/A	N/A	N/A	30C; anaerobic; light	~0.1	0.749	Outgrowth culture from carbon starvation T14 (biological replicate 2)
	Starv 3-T14	CAAc	N/A	N/A	N/A	30C; anaerobic; light	~0.1	0.713	Outgrowth culture from carbon starvation T14 (biological replicate 3)
	Starv 4-T14	CAAc	N/A	N/A	N/A	30C; anaerobic; light	~0.1	0.715	Outgrowth culture from carbon starvation T14 (biological replicate 4)
	CGA009 PM T0	PM washed	N/A	N/A	N/A	N/A	N/A	N/A	PM washed CAAc/Km grown cells used for all fitness assay (T0 sample); applies to all other UW samples highlighted in blue
	CGA009 T0	CAAc/Km100	N/A	N/A	N/A	N/A	N/A	N/A	T0 sample; applies to all other UW samples highlighted in blue
5	γ-Ami buty 1	PM	γ-Amino butyric acid	10	10	30C; anaerobic; light	0.0434783	0.717	Growth on PM plus γ-amino butyric acid
	γ-Ami buty 2	PM	γ-Amino butyric acid	10	10	30C; anaerobic; light	0.0434783	0.6905	Growth on PM plus γ-amino butyric acid
	γ-Ami buty 3	PM	γ-Amino butyric acid	10	10	30C; anaerobic; light	0.0434783	0.7905	Growth on PM plus γ-amino butyric acid
	γ-Ami buty 4	PM	γ-Amino butyric acid	10	10	30C; anaerobic; light	0.0434783	0.8805	Growth on PM plus γ-amino butyric acid
6	Azelaic 1	PM	Azelaic acid	3	10	30C; anaerobic; light	0.0434783	0.983	Growth on PM plus azelaic acid
	Azelaic 2	PM	Azelaic acid	3	10	30C; anaerobic; light	0.0434783	1.034	Growth on PM plus azelaic acid
	Azelaic 3	PM	Azelaic acid	3	10	30C; anaerobic; light	0.0434783	1.006	Growth on PM plus azelaic acid
	Azelaic 4	PM	Azelaic acid	3	10	30C; anaerobic; light	0.0434783	1.0575	Growth on PM plus azelaic acid
7	Butyric 1	PM	Butyric acid	10	10	30C; anaerobic; light	0.0434783	1.178	Growth on PM plus butyric acid
	Butyric 2	PM	Butyric acid	10	10	30C; anaerobic; light	0.0434783	1.186	Growth on PM plus butyric acid
	Butyric 3	PM	Butyric acid	10	10	30C; anaerobic; light	0.0434783	1.186	Growth on PM plus butyric acid
	Butyric 4	PM	Butyric acid	10	10	30C; anaerobic; light	0.0434783	1.104	Growth on PM plus butyric acid
8	Citracon 1	PM	Citraconic acid	10	10	30C; anaerobic; light	0.0434783	0.8511	Growth on PM plus citraconic acid
	Citracon 2	PM	Citraconic acid	10	10	30C; anaerobic; light	0.0434783	0.969	Growth on PM plus citraconic acid
	Citracon 3	PM	Citraconic acid	10	10	30C; anaerobic; light	0.0434783	0.8305	Growth on PM plus citraconic acid
	Citracon 4	PM	Citraconic acid	10	10	30C; anaerobic; light	0.0434783	0.8805	Growth on PM plus citraconic acid
9	Fumaric 1	PM	fumarate	10	N/A	30C; anaerobic; light	0.0439024	0.7475	Growth on PM plus fumaric acid
	Fumaric 2	PM	fumarate	10	N/A	30C; anaerobic; light	0.0439024	0.8405	Growth on PM plus fumaric acid
	Fumaric 3	PM	fumarate	10	N/A	30C; anaerobic; light	0.0439024	0.855	Growth on PM plus fumaric acid
	Fumaric 4	PM	fumarate	10	N/A	30C; anaerobic; light	0.0439024	0.879	Growth on PM plus fumaric acid
10	Leucine 1	PM	L-Leucine	4.5	10	30C; anaerobic; light	0.042654	0.6365	Growth on PM plus L-leucine
	Leucine 2	PM	L-Leucine	4.5	10	30C; anaerobic; light	0.042654	0.689	Growth on PM plus L-leucine
	Leucine 3	PM	L-Leucine	4.5	10	30C; anaerobic; light	0.042654	0.707	Growth on PM plus L-leucine
	Leucine 4	PM	L-Leucine	4.5	10	30C; anaerobic; light	0.042654	0.8285	Growth on PM plus L-leucine
11	Malic 1	PM	malate	10	N/A	30C; anaerobic; light	0.0439024	0.6225	Growth on PM plus malic acid
	Malic 2	PM	malate	10	N/A	30C; anaerobic; light	0.0439024	0.644	Growth on PM plus malic acid
	Malic 3	PM	malate	10	N/A	30C; anaerobic; light	0.0439024	0.684	Growth on PM plus malic acid
	Malic 4	PM	malate	10	N/A	30C; anaerobic; light	0.0439024	0.724	Growth on PM plus malic acid
12	Pimelic 1	PM	Pimelic acid	3	10	30C; anaerobic; light	0.0434783	0.695	Growth on PM plus pimelic acid
	Pimelic 2	PM	Pimelic acid	3	10	30C; anaerobic; light	0.0434783	0.673	Growth on PM plus pimelic acid
	Pimelic 3	PM	Pimelic acid	3	10	30C; anaerobic; light	0.0434783	0.6405	Growth on PM plus pimelic acid
	Pimelic 4	PM	Pimelic acid	3	10	30C; anaerobic; light	0.0434783	0.7265	Growth on PM plus pimelic acid
13	Sebacic 1	PM	Sebacic acid	1.5	10	30C; anaerobic; light	0.0434783	0.6065	Growth on PM plus sebacic acid
	Sebacic 2	PM	Sebacic acid	1.5	10	30C; anaerobic; light	0.0434783	0.628	Growth on PM plus sebacic acid
	Sebacic 3	PM	Sebacic acid	1.5	10	30C; anaerobic; light	0.0434783	0.6385	Growth on PM plus sebacic acid
	Sebacic 4	PM	Sebacic acid	1.5	10	30C; anaerobic; light	0.0434783	0.687	Growth on PM plus sebacic acid
	CGA009 run1 t0	CAAc/Km100	N/A	N/A	N/A	N/A	N/A	N/A	T0 sample; applies to all other UW samples highlighted in yellow
	CGA009 run1 PM t0	PM washed	N/A	N/A	N/A	N/A	N/A	N/A	PM washed CAAc/Km grown cells used for all fitness assay (T0 sample); applies to all other UW samples highlighted in blue
14	Acetate 1	PM	Acetate	20	N/A	30C; anaerobic; light	0.0439024	1.275
	Acetate 2	PM	Acetate	20	N/A	30C; anaerobic; light	0.0439024	1.57
	Acetate 3	PM	Acetate	20	N/A	30C; anaerobic; light	0.0439024	1.529
15	Succinate 1	PM	Succinate	10	N/A	30C; anaerobic; light	0.0439024	1.362
	Succinate 2	PM	Succinate	10	N/A	30C; anaerobic; light	0.0439024	1.305
	Succinate 3	PM	Succinate	10	N/A	30C; anaerobic; light	0.0439024	1.392
16	Benzoate 1	PM	Benzoate	3	10	30C; anaerobic; light	0.0434783	0.725
	Benzoate 2	PM	Benzoate	3	10	30C; anaerobic; light	0.0434783	0.74
	Benzoate 3	PM	Benzoate	3	10	30C; anaerobic; light	0.0434783	0.743
17	p-Coumarate 1	PM	p-Coumerate	3	10	30C; anaerobic; light	0.0434783	0.857
	p-Coumarate 2	PM	p-Coumerate	3	10	30C; anaerobic; light	0.0434783	0.887
	p-Coumarate 3	PM	p-Coumerate	3	10	30C; anaerobic; light	0.0434783	0.866
18	4-hydroxybenzoate 1	PM	4-Hydroxy benzoate	3	10	30C; anaerobic; light	0.0434783	0.74
	4-hydroxybenzoate 2	PM	4-Hydroxy benzoate	3	10	30C; anaerobic; light	0.0434783	0.695
	4-hydroxybenzoate 3	PM	4-Hydroxy benzoate	3	10	30C; anaerobic; light	0.0434783	0.68
	WT Tn5 T0 NMR 1	CAAc/Km100	N/A	N/A	NA	30C; anaerobic; light	N/A	N/A	T0 sample (WT Tn5 T0 NMR 1, 2, and 3 are identical) used to inoculate into NoS_malate; applies to all UMN samples highlighted in blue
	WT Tn5 T0 NMR 2	CAAc/Km100	N/A	N/A	NA	30C; anaerobic; light	N/A	N/A	T0 sample (WT Tn5 T0 NMR 1, 2, and 3 are identical) used to inoculate into NoS_malate; applies to all UMN samples highlighted in blue
	WT Tn5 T0 NMR 3	CAAc/Km100	N/A	N/A	NA	30C; anaerobic; light	N/A	N/A	T0 sample (WT Tn5 T0 NMR 1, 2, and 3 are identical) used to inoculate into NoS_malate; applies to all UMN samples highlighted in blue
	WT Tn5 T0 NoS NMR 1	NoS wash	Malate	10	NA	30C; anaerobic; light	N/A	N/A	NoS washed NoS_malate grown cells used for fitness assay (True T0 sample) (WT Tn5 T0 NoS NMR 1, 2, and 3 are identical); applies to all UMN samples highlighted in blue
	WT Tn5 T0 NoS NMR 2	NoS wash	Malate	10	NA	30C; anaerobic; light	N/A	N/A	NoS washed NoS_malate grown cells used for fitness assay (True T0 sample) (WT Tn5 T0 NoS NMR 1, 2, and 3 are identical); applies to all UMN samples highlighted in blue
	WT Tn5 T0 NoS NMR 3	NoS wash	Malate	10	NA	30C; anaerobic; light	N/A	N/A	NoS washed NoS_malate grown cells used for fitness assay (True T0 sample) (WT Tn5 T0 NoS NMR 1, 2, and 3 are identical); applies to all UMN samples highlighted in blue
19	WT Tn5 T0 NoS NMR 1	NoS	Malate	10	NA	30C; anaerobic; light	0.041	0.328
	WT Tn5 T0 NoS NMR 2	NoS	Malate	10	NA	30C; anaerobic; light	0.038	0.349
	WT Tn5 T0 NoS NMR 3	NoS	Malate	10	NA	30C; anaerobic; light	0.039	0.311
	WT Tn5 T0 NoS NMR 4	NoS	Malate	10	NA	30C; anaerobic; light	0.039	0.318
20	WT Tn5 NoS MT-EtOH 1	NoS	Malate + 2-(Methylthio)ethanol	10 +1	NA	30C; anaerobic; light	0.05	1.069
	WT Tn5 NoS MT-EtOH 2	NoS	Malate + 2-(Methylthio)ethanol	10 +1	NA	30C; anaerobic; light	0.058	1.142
	WT Tn5 NoS MT-EtOH 3	NoS	Malate + 2-(Methylthio)ethanol	10 +1	NA	30C; anaerobic; light	0.058	0.941
	WT Tn5 NoS MT-EtOH 4	NoS	Malate + 2-(Methylthio)ethanol	10 +1	NA	30C; anaerobic; light	0.058	0.993
21	WT Tn5 T0 NoS EMS 1	NoS	Malate + ethyl methyl sulfide	10 +1	NA	30C; anaerobic; light	0.059	0.816
	WT Tn5 T0 NoS EMS 2	NoS	Malate + ethyl methyl sulfide	10 +1	NA	30C; anaerobic; light	0.051	0.833
	WT Tn5 T0 NoS EMS 3	NoS	Malate + ethyl methyl sulfide	10 +1	NA	30C; anaerobic; light	0.058	0.818
	WT Tn5 T0 NoS EMS 4	NoS	Malate + ethyl methyl sulfide	10 +1	NA	30C; anaerobic; light	0.058	0.794
22	WT Tn5 T0 NoS Tau 1	NoS	Malate + taurine	10 +1	NA	30C; anaerobic; light	0.04	0.814
	WT Tn5 T0 NoS Tau 2	NoS	Malate + taurine	10 +1	NA	30C; anaerobic; light	0.044	0.829
	WT Tn5 T0 NoS Tau 3	NoS	Malate + taurine	10 +1	NA	30C; anaerobic; light	0.042	0.779
	WT Tn5 T0 NoS Tau 4	NoS	Malate + taurine	10 +1	NA	30C; anaerobic; light	0.042	0.73
23	WT Tn5 T0 NoS Ise 1	NoS	Malate + isethionate	10 +1	NA	30C; anaerobic; light	0.041	0.846
	WT Tn5 T0 NoS Ise 2	NoS	Malate + isethionate	10 +1	NA	30C; anaerobic; light	0.039	0.674
	WT Tn5 T0 NoS Ise 3	NoS	Malate + isethionate	10 +1	NA	30C; anaerobic; light	0.041	0.77
	WT Tn5 T0 NoS Ise 4	NoS	Malate + isethionate	10 +1	NA	30C; anaerobic; light	0.04	0.775
24	WT Tn5 T0 NoS Thi. HCl 1	NoS	Malate + thiamine HCl	10 +1	NA	30C; anaerobic; light	0.058	0.542
	WT Tn5 T0 NoS Thi. HCl 2	NoS	Malate + thiamine HCl	10 +1	NA	30C; anaerobic; light	0.058	0.572
	WT Tn5 T0 NoS Thi. HCl 3	NoS	Malate + thiamine HCl	10 +1	NA	30C; anaerobic; light	0.058	0.562
	WT Tn5 T0 NoS Thi. HCl 4	NoS	Malate + thiamine HCl	10 +1	NA	30C; anaerobic; light	0.058	0.527
	WT Tn5 T0 V2	CAAc/Km100	N/A	N/A	NA	30C; anaerobic; light	N/A	N/A	T0 sample (WT Tn5 T0 V2 1, 2, and 3 are identical) used to inoculate into NoS_acetate; applies to all UMN samples highlighted in pink
	WT T5 T0 NoS V2	NoS wash	Acetate	20	NA	30C; anaerobic; light	N/A	N/A	NoS washed NoS_acetate grown cells used for fitness assay (True T0 sample); applies to all UMN samples highlighted in pink
25	WT Tn5 DMS 1	NoS	Acetate + dimethyl sulfide	20 + 1	NA	30C; anaerobic; light	0.054	1.406
	WT Tn5 DMS 2	NoS	Acetate + dimethyl sulfide	20 + 1	NA	30C; anaerobic; light	0.054	1.407
	WT Tn5 DMS 3	NoS	Acetate + dimethyl sulfide	20 + 1	NA	30C; anaerobic; light	0.055	1.371
	WT Tn5 DMS 4	NoS	Acetate + dimethyl sulfide	20 + 1	NA	30C; anaerobic; light	0.049	0.908
26	WT Tn5 DMSP 1	NoS	Acetate + dimethylsulfoniopropionate	20 + 1	NA	30C; anaerobic; light	0.052	0.855
	WT Tn5 DMSP 2	NoS	Acetate + dimethylsulfoniopropionate	20 + 1	NA	30C; anaerobic; light	0.04	0.877
	WT Tn5 DMSP 3	NoS	Acetate + dimethylsulfoniopropionate	20 + 1	NA	30C; anaerobic; light	0.046	1.375
	WT Tn5 DMSP 4	NoS	Acetate + dimethylsulfoniopropionate	20 + 1	NA	30C; anaerobic; light	0.049	0.782
	Barcode T0	CAAc/Km100	N/A	N/A	NA	30C; anaerobic; light	N/A	N/A	T0 sample used to inoculate into NoS_acetate and NMF_acetate; applies to all UMN samples highlighted in green and purple
	WT Tn5 NoS Sulfac T0 1	NoS wash	Acetate	20	NA	30C; anaerobic; light	0.027	0.142	NoS washed NoS_acetate grown cells used for fitness assay (True T0 sample) (WT_Tn5_T0_Sulf_ac_T0_NMR 1, 2, and 3 are identical); applies to all UMN samples highlighted in green
	WT Tn5 NoS Sulfac T0 2	NoS wash	Acetate	20	NA	30C; anaerobic; light	0.023	0.105
	WT Tn5 NoS Sulfac T0 3	NoS wash	Acetate	20	NA	30C; anaerobic; light	0.023	0.102
27	WT Tn5 NoS Sulfacid 1	NoS	Acetate + Sulfoacetic acid	20 + 1	NA	30C; anaerobic; light	0.033	1.095
	WT Tn5 NoS Sulfacid 2	NoS	Acetate + Sulfoacetic acid	20 + 1	NA	30C; anaerobic; light	0.028	0.966
	WT Tn5 NoS Sulfacid 3	NoS	Acetate + Sulfoacetic acid	20 + 1	NA	30C; anaerobic; light	0.023	1.076
	WT Tn5 NoS Sulfacid 4	NoS	Acetate + Sulfoacetic acid	20 + 1	NA	30C; anaerobic; light	0.032	1.021
	NFM T0	NFM wash	Acetate	10	NA	30C; anaerobic; light	0.033	1.01	NFM washed NMF_acetate grown cells (T0 sample) used to inoculate into NFM No Mo_acetate; applies to all UMN samples highlighted in purple
	NFM No Mo T0	NFM No Mo wash	Acetate	20	NA	30C; anaerobic; light	0.035	0.801	NFM No Mo washed NFM No Mo_acetate grwon cells used for fitness assay (True T0 sample); applies to all UMN samples highlighted in purple
28	NFM No Mo Vcl3 R1	NFM No Mo Vcl3	Acetate	20	NA	30C; anaerobic; light	0.034	0.855
	NFM No Mo Vcl3 R2	NFM No Mo Vcl3	Acetate	20	NA	30C; anaerobic; light	0.04	0.809
	NFM No Mo Vcl3 R3	NFM No Mo Vcl3	Acetate	20	NA	30C; anaerobic; light	0.038	0.901
29	NFM No Mo R1	NFM No Mo	Acetate	20	NA	30C; anaerobic; light	0.033	0.911
	NFM No Mo R2	NFM No Mo	Acetate	20	NA	30C; anaerobic; light	0.031	0.923
	NFM No Mo R3	NFM No Mo	Acetate	20	NA	30C; anaerobic; light	0.035	1.011
30	NFM succinate R1	NFM	Succinate	10	NA	30C; anaerobic; light	0.041	0.9
	NFM succinate R2	NFM	Succinate	10	NA	30C; anaerobic; light	0.038	0.931
	NFM succinate R3	NFM	Succinate	10	NA	30C; anaerobic; light	0.045	0.921
31	NFM pyruvate R1	NFM	Pyruvate	10	NA	30C; anaerobic; light	0.038	0.775
	NFM pyruvate R2	NFM	Pyruvate	10	NA	30C; anaerobic; light	0.035	0.819
	NFM pyruvate R3	NFM	Pyruvate	10	NA	30C; anaerobic; light	0.032	0.752
	T0 backup 1	CAAc/Km100	N/A	N/A	N/A	30C; anaerobic; light	N/A	N/A	T0 sample (T0 backup, r1, r2, and r3 are identical) used to inoculate into PM_acetate; applies to all UMN samples highlighted in orange
	T0 backup 2	CAAc/Km100	N/A	N/A	N/A	30C; anaerobic; light	N/A	N/A
	T0 backup 3	CAAc/Km100	N/A	N/A	N/A	30C; anaerobic; light	N/A	N/A
	PMac r1	PM wash	Acetate	20	N/A	30C; anaerobic; light	N/A	N/A	PM washed PM_acetate grown cells used for fitness assay (True T0 sample) (PMac Final r1, r2, and r3 are identical); applies to all UMN samples highlighted in orange
	PMac r2	PM wash	Acetate	20	N/A	30C; anaerobic; light	N/A	N/A
	PMac r3	PM wash	Acetate	20	N/A	30C; anaerobic; light	N/A	N/A
32	PM HBA r1	PM	4HBA	5.7	10mM	30C; anaerobic; light	0.3-0.4	0.8-0.9
	PM HBA r2	PM	4HBA	5.7	10mM	30C; anaerobic; light	0.3-0.4	0.8-0.9
	PM HBA r3	PM	4HBA	5.7	10mM	30C; anaerobic; light	0.3-0.4	0.8-0.9
33	PM Decay r1	PM	LateDecay	N/D	10mM	30C; anaerobic; light	0.3-0.4	0.5-0.6	LateDecay is substrate that came from aspen wood chips that have been decomposed by a fungus
	PM Decay r2	PM	LateDecay	N/D	10mM	30C; anaerobic; light	0.3-0.4	0.5-0.6	LateDecay is substrate that came from aspen wood chips that have been decomposed by a fungus
	PM Decay r3	PM	LateDecay	N/D	10mM	30C; anaerobic; light	0.3-0.4	0.5-0.6	LateDecay is substrate that came from aspen wood chips that have been decomposed by a fungus
34	PM ac+F r1	PM	Acetate + fluorine	20 + 50	N/A	30C; anaerobic; light	0.3-0.4	0.8-0.9
	PM ac+F r2	PM	Acetate + fluorine	20 + 50	N/A	30C; anaerobic; light	0.3-0.4	0.8-0.9
	PM ac+F r3	PM	Acetate + fluorine	20 + 50	N/A	30C; anaerobic; light	0.3-0.4	0.8-0.9
35	PM benz+F r1	PM	Benzoate + fluorine	5.7 + 50	N/A	30C; anaerobic; light	0.3-0.4	0.8-0.9
	PM benz+F r2	PM	Benzoate + fluorine	5.7 + 50	N/A	30C; anaerobic; light	0.3-0.4	0.8-0.9
	PM benz+F r3	PM	Benzoate + fluorine	5.7 + 50	N/A	30C; anaerobic; light	0.3-0.4	0.8-0.9
	IU T0 growth	CAAc/Km100	N/A	N/A	N/A	N/A	N/A	N/A	T0 sample; applies to all IU samples highlighted in blue
	IU T0 washed	PM washed	N/A	N/A	N/A	N/A	N/A	N/A	PM washed CAAc/Km grown cells used for fitness assay 1 (T0 sample); applies to all IU samples highlighted in blue
36	SuccFor_L_An_30	PM	Succinate + Formate	10 + 20	N/A	30C; anaerobic; light	0.07	1.37
	SuccFor_L_An_31	PM	Succiante + Formate	10 + 20	N/A	30C; anaerobic; light	0.077	1.37
	SuccFor_L_An_32	PM	Succiante + Formate	10 + 20	N/A	30C; anaerobic; light	0.09	1.65
37	Succ_L_An_33	PM	Succinate	10	N/A	30C; anaerobic; light	0.079	0.97
	Succ_L_An_35	PM	Succinate	10	N/A	30C; anaerobic; light	0.071	1.01
	Succ_L_An_36	PM	Succinate	10	N/A	30C; anaerobic; light	0.064	1.15
38	ForCO2_An_L_41	PM	Formate + Bicarb	20	20	30C; anaerobic; light	0.067	0.37
	ForCO2_An_L_42	PM	Formate + Bicarb	20	20	30C; anaerobic; light	0.068	0.379
	ForCO2_An_L_43	PM	Formate + Bicarb	20	20	30C; anaerobic; light	0.065	0.406
39	SuccFor_D_Ae_45	PM	Succinate + Formate	10 + 20	N/A	30C; aerobic; dark	0.177	0.75
	SuccFor_D_Ae_46	PM	Succinate + Formate	10 + 20	N/A	30C; aerobic; dark	0.121	0.74
	SuccFor_D_Ae_47	PM	Succinate + Formate	10 + 20	N/A	30C; aerobic; dark	0.119	0.94
40	SuccNaCl_D_Ae_49	PM	Succinate + NaCl	10 + 20	N/A	30C; aerobic; dark	0.114	0.636
	SuccNaCl_D_Ae_50	PM	Succinate + NaCl	10 + 20	N/A	30C; aerobic; dark	0.125	0.642
	SuccNaCl_D_Ae_52	PM	Succinate + NaCl	10 + 20	N/A	30C; aerobic; dark	0.121	0.659
41	Succ_D_Ae_53	PM	Succinate	10	N/A	30C; aerobic; dark	0.12	0.636
	Succ_D_Ae_55	PM	Succinate	10	N/A	30C; aerobic; dark	0.127	0.691
	Succ_D_Ae_56	PM	Succinate	10	N/A	30C; aerobic; dark	0.128	0.667
42	Buty_D_Ae_61	PM	Butyrate	10	N/A	30C; aerobic; dark	0.12	0.445
	Buty_D_Ae_62	PM	Butyrate	10	N/A	30C; aerobic; dark	0.123	0.436
	Buty_D_Ae_64	PM	Butyrate	10	N/A	30C; aerobic; dark	0.118	0.445
43	ThioCO2a_L_An_65	PM	thiosulfate + bicarb	30	60	30C; anaerobic; light; 100% Ar	0.074	0.113734
	ThioCO2a_L_An_66	PM	thiosulfate + bicarb	30	60	30C; anaerobic; light; 100% Ar	0.063	0.0889345
	ThioCO2a_L_An_67	PM	thiosulfate + bicarb	30	60	30C; anaerobic; light; 100% Ar	0.064	0.101762
	ThioCO2a_L_An_68	PM	thiosulfate + bicarb	30	60	30C; anaerobic; light; 100% Ar	0.069	0.101762
44	ThioCO2b_L_An_69	PM	thiosulfate + bicarb	50	20	30C; anaerobic; light; 100% Ar	0.068	0.331794
	ThioCO2b_L_An_70	PM	thiosulfate + bicarb	50	20	30C; anaerobic; light; 100% Ar	0.066	0.311271
	ThioCO2b_L_An_71	PM	thiosulfate + bicarb	50	20	30C; anaerobic; light; 100% Ar	0.085	0.333504
	ThioCO2b_L_An_72	PM	thiosulfate + bicarb	50	20	30C; anaerobic; light; 100% Ar	0.07	0.355738
45	ButyCO2_81	MDC	Butyrate + bicarb	10	10	30C; anaerobic; light	0.062	0.851719
	ButyCO2_82	MDC	Butyrate + bicarb	10	10	30C; anaerobic; light	0.081	0.838892
	ButyCO2_83	MDC	Butyrate + bicarb	10	10	30C; anaerobic; light	0.067	0.819224
	ButyCO2_84	MDC	Butyrate + bicarb	10	10	30C; anaerobic; light	0.067	0.785873
46	ButyAdeCO2_85	MDC	Butyrate + adenine + bicarb	10 + 2	10	30C; anaerobic; light	0.082	0.374551
	ButyAdeCO2_86	MDC	Butyrate + adenine + bicarb	10 + 2	10	30C; anaerobic; light	0.065	0.271079
	ButyAdeCO2_87	MDC	Butyrate + adenine + bicarb	10 + 2	10	30C; anaerobic; light	0.078	0.305285
	ButyAdeCO2_88	MDC	Butyrate + adenine + bicarb	10 + 2	10	30C; anaerobic; light	0.067	0.292458
	3.28.24 no washed	CAAc/Km100	N/A	N/A	N/A	N/A	N/A	N/A	T0 sample; applies to all IU samples highlighted in pink
	Washed T0	PM washed	N/A	N/A	N/A	N/A	N/A	N/A	PM washed CAAc/Km grown cells used for fitness assay 2 (T0 sample); applies to all IU samples highlighted in pink
47	ButyCO2Ar_L_An_1	PM	Butyrate + bicarb	10	10	30C; anaerobic; light; 100% Ar	0.066	0.773901
	ButyCO2Ar_L_An_2	PM	Butyrate + bicarb	10	10	30C; anaerobic; light; 100% Ar	0.049	0.742261
	ButyCO2Ar_L_An_3	PM	Butyrate + bicarb	10	10	30C; anaerobic; light; 100% Ar	0.058	0.6157
	ButyCO2Ar_L_An_4	PM	Butyrate + bicarb	10	10	30C; anaerobic; light; 100% Ar	0.056	0.749102
48	Buty025N2ONaCl_L_An_5	PM	Butyrate + NaCl	10 + 0.1	N/A	30C; anaerobic; light; 75% Ar + 25% N2O	0.069	1.07063
	Buty025N2ONaCl_L_An_6	PM	Butyrate + NaCl	10 + 0.1	N/A	30C; anaerobic; light; 75% Ar + 25% N2O	0.045	0.964597
	Buty025N2ONaCl_L_An_7	PM	Butyrate + NaCl	10 + 0.1	N/A	30C; anaerobic; light; 75% Ar + 25% N2O	0.046	1.05182
	Buty025N2ONaCl_L_An_8	PM	Butyrate + NaCl	10 + 0.1	N/A	30C; anaerobic; light; 75% Ar + 25% N2O	0.063	1.29554
49	Buty025N2ONaNO3_L_An_9	PM	Butyrate + NaNO3	10 + 0.1	N/A	30C; anaerobic; light; 75% Ar + 25% N2O	0.065	0.92184
	Buty025N2ONaNO3_L_An_10	PM	Butyrate + NaNO3	10 + 0.1	N/A	30C; anaerobic; light; 75% Ar + 25% N2O	0.059	0.832051
	Buty025N2ONaNO3_L_An_11	PM	Butyrate + NaNO3	10 + 0.1	N/A	30C; anaerobic; light; 75% Ar + 25% N2O	0.056	0.758509
	Buty025N2ONaNO3_L_An_12	PM	Butyrate + NaNO3	10 + 0.1	N/A	30C; anaerobic; light; 75% Ar + 25% N2O	0.064	0.785018
50	Buty100N2ONaNO3_L_An_13	PM	Butyrate + NaNO3	10 + 0.1	N/A	30C; anaerobic; light; 100% N2O	0.068	0.730289
	Buty100N2ONaNO3_L_An_14	PM	Butyrate + NaNO3	10 + 0.1	N/A	30C; anaerobic; light; 100% N2O	0.053	0.912434
	Buty100N2ONaNO3_L_An_15	PM	Butyrate + NaNO3	10 + 0.1	N/A	30C; anaerobic; light; 100% N2O	0.055	0.720883
	Buty100N2ONaNO3_L_An_16	PM	Butyrate + NaNO3	10 + 0.1	N/A	30C; anaerobic; light; 100% N2O	0.092	0.674705
51	Buty025N2ONaCl_D_An_17	PM	Butyrate + NaCl	10 + 0.1	N/A	30C; anaerobic; dark; 75% Ar + 25% N2O	0.076	0.320677
	Buty025N2ONaCl_D_An_18	PM	Butyrate + NaCl	10 + 0.1	N/A	30C; anaerobic; dark; 75% Ar + 25% N2O	0.055	0.279631
	Buty025N2ONaCl_D_An_19	PM	Butyrate + NaCl	10 + 0.1	N/A	30C; anaerobic; dark; 75% Ar + 25% N2O	0.054	0.292458
	Buty025N2ONaCl_D_An_20	PM	Butyrate + NaCl	10 + 0.1	N/A	30C; anaerobic; dark; 75% Ar + 25% N2O	0.059	0.329229
52	Buty025N2ONaNO3_D_An_21	PM	Butyrate + NaNO3	10 + 0.1	N/A	30C; anaerobic; dark; 75% Ar + 25% N2O	0.066	0.312126
	Buty025N2ONaNO3_D_An_22	PM	Butyrate + NaNO3	10 + 0.1	N/A	30C; anaerobic; dark; 75% Ar + 25% N2O	0.052	0.27621
	Buty025N2ONaNO3_D_An_23	PM	Butyrate + NaNO3	10 + 0.1	N/A	30C; anaerobic; dark; 75% Ar + 25% N2O	0.048	0.272789
	Buty025N2ONaNO3_D_An_24	PM	Butyrate + NaNO3	10 + 0.1	N/A	30C; anaerobic; dark; 75% Ar + 25% N2O	0.078	0.285617
53	Buty100N2ONaNO3_CO2_D_An_25	PM	Butyrate + NaNO3+ bicarb	10 + 0.1	0.1	30C; anaerobic; dark; 100% N2O	0.07	0.683256
	Buty100N2ONaNO3_CO2_D_An_26	PM	Butyrate + NaNO3+ bicarb	10 + 0.1	0.1	30C; anaerobic; dark; 100% N2O	0.054	0.664443
	Buty100N2ONaNO3_CO2_D_An_27	PM	Butyrate + NaNO3+ bicarb	10 + 0.1	0.1	30C; anaerobic; dark; 100% N2O	0.06	0.67385
	Buty100N2ONaNO3_CO2_D_An_28	PM	Butyrate + NaNO3+ bicarb	10 + 0.1	0.1	30C; anaerobic; dark; 100% N2O	0.079	0.634513
54	Coculture_MDC_L_An_73	MDC	Glucose + NaCl + NH4Cl	25+ 44 + 10	N/A	30C; anaerobic; light; coculture w E. coli PFM2 dpurH	0.097	1.07577
	Coculture_MDC_L_An_74	MDC	Glucose + NaCl + NH4Cl	25+ 44 + 10	N/A	30C; anaerobic; light; coculture w E. coli PFM2 dpurH	0.088	1.07662
	Coculture_MDC_L_An_75	MDC	Glucose + NaCl + NH4Cl	25+ 44 + 10	N/A	30C; anaerobic; light; coculture w E. coli PFM2 dpurH	0.088	1.07577
55	Mono_MDC_OAcs_L_An_77	MDC	Oacs	see Table S2	N/A	30C; anaerobic; light, 10 mM NH4Cl	0.087	0.721738
	Mono_MDC_OAcs_L_An_79	MDC	Oacs	see Table S2	N/A	30C; anaerobic; light; 10 mM NH4Cl	0.073	0.687532
	Mono_MDC_OAcs_L_An_80	MDC	Oacs	see Table S2	N/A	30C; anaerobic; light; 10 mM NH4Cl	0.083	0.689242
56	LacNaCl_L_An_105	PM	Lactate + NaCl	13 + 10	N/A	30C; anaerobic; light	0.09	1.09458
	LacNaCl_L_An_106	PM	Lactate + NaCl	13 + 10	N/A	30C; anaerobic; light	0.065	1.14931
	LacNaCl_L_An_107	PM	Lactate + NaCl	13 + 10	N/A	30C; anaerobic; light	0.062	1.17069
57	LacAce_L_An_110	PM	Lactate + Acetate	13 + 10	N/A	30C; anaerobic; light	0.069	1.17411
	LacAce_L_An_111	PM	Lactate + Acetate	13 + 10	N/A	30C; anaerobic; light	0.063	1.18522
	LacAce_L_An_112	PM	Lactate + Acetate	13 + 10	N/A	30C; anaerobic; light	0.058	1.18522
58	Ace_L_An_113	PM	Acetate	20	N/A	30C; anaerobic; light	0.078	0.775611
	Ace_L_An_114	PM	Acetate	20	N/A	30C; anaerobic; light	0.073	0.900462
	Ace_L_An_116	PM	Acetate	20	N/A	30C; anaerobic; light	0.064	0.991107

## Sheet: Table S2 Media compositions
Table S2. Growth media used in this study
PM
PM component	For 1L	Concentration
0.5M Na2HPO4	25mL	12.5mM
0.5M KH2PO4	25mL	12.5mM
10% (NH4)2SO4	10mL	0.001
Concentrated base*	1mL	N/A
0.1M Na2S2O3·5H2O	1mL	0.1mM
2mg/mL p-aminobenzoic acid (PABA)	1mL	2mg/L
Double distilled water	Bring volume to 1L
NFM
NFM component	For 1L	Concentration
0.5M Na2HPO4	25mL	12.5mM
0.5M KH2PO4	25mL	12.5mM
Concentrated base*	1mL	N/A
0.1M Na2S2O3·5H2O	1mL	0.1mM
2mg/mL p-aminobenzoic acid (PABA)	1mL	2mg/L
Double distilled water	Bring volume to 1L
Nitrogen source is supplied as N2 gas in the headspace of anaerobic tube
NFM No Mo
NFM without (NH4)6Mo7O24·4H2O
NFM No Mo VCl3
NFM without (NH4)6Mo7O24·4H2O but with 10 µM VCl3 added
NoS
PM but all sulfate salts replaced with chloride salts
CAAc (PM plus 0.2% yeast extract and 0.5% casamino acids)
CAAc component	For 1L	Concentration
0.5M Na2HPO4	25mL	12.5mM
0.5M KH2PO4	25mL	12.5mM
10% (NH4)2SO4	10mL	0.001
Concentrated base*	1mL	N/A
0.1M Na2S2O3·5H2O	1mL	0.1mM
2mg/mL p-aminobenzoic acid (PABA)	1mL	2mg/L
Yeast extract	2g	0.002
Casamino acids	5g	0.005
Double distilled water	Bring volume to 1L
MDC (M9-derived coculture medium):
CAAc component	For 1L	Concentration
Na2HPO4	Dissolve powder	42.5 mM
KH2PO4	Dissolve powder	22 mM
0.1M Na2S2O3·5H2O	1mL	0.1 mM
2mg/mL p-aminobenzoic acid (PABA)	1mL	14.6 uM
Concentrated base*	1mL	0.1% v/v
100X MgSO4	Add to tube autoclaving	1 mM
100X CaCl2	Add to tube autoclaving	0.1 mM
*Concentrated base
Concentrated base component	For 1L
Nitrilotriacetic acid (NTA-free acid)	20g
MgSO4 anhydrous	28.9g
CaCl2·2H2O	6.67g
(NH4)6Mo7O24·4H2O	0.0185g
FeSO4·7H2O	0.198g
Metal 44**	100mL
Double distilled water	Bring volume to 1L
**Metal 44
Metal 44 component	For 1L
EDTA (free acid, not sodium salt)	2.5g
ZnSO4·7H2O	10.95g
FeSO4·7H2O	5g
MnSO4·H2O	1.54g
CuSO4·5H2O	0.392g
Co(NO3)2·6H2O	0.25g
Na2B4O7·10H2O	0.177g
Double distilled water	Bring volume to 1L
Supplements
Compound	CAS No
γ-Amino butyric acid	56-12-2
Azelaic acid	123-99-9
Butyric acid	107-92-6
Citraconic acid	498-23-7
Disodium fumarate	17013-01-3
L-Leucine	61-90-5
Disodium L-malate	138-09-0
Pimelic acid	111-16-0
Sebacic acid	111-20-6
Sodium acetate trihydrate	6131-90-4
Sodium succinate hexahydrate	6106-21-4
Sodium benzoate	532-32-1
p-Hydroxycinnamic acid	501-98-4
p-Hydroxybenzoic acid	99-96-7
Sodium acetate trihydrate	6131-90-4
Sodium pyruvate	113-24-6
Sodium 4-hydroxybenzoate	114-63-6
Sodium fluoride	7681-49-4
Sulfoacetic acid	123-43-3
Dimethylsulfoniopropionate	7314-30-9
Dimethyl sulfide	75-18-3
Thiamine hydrochloride	67-03-8
Sodium isethionate	1562-00-1
Taurine	107-35-7
Ethyl methyl sulfide	624-89-5
2-(Methylthio)ethanol	5271-38-5
Vanadium (III) chloride	7718-98-1
Sodium bicarbonate	144-55-8
Sodium formate	141-53-7
Glucose	50-99-7
Sodium lactate	867-56-1
Sodium butyrate	156-54-7
Ethanol	64-17-5
Adenine	73-24-5
Sodium thiosulfate, pentahydrate	10102-17-7
OAcs
Mixture of 2 mM succinate, 10 mM acetate, 13 mM lactate, 17 mM formate, 12 mM ethanol, 10 mM NH4Cl
